# Supplementary material for: Quality of Life in Post-COVID-19 Patients after Hospitalization
Source: MDPI journal article supplement (doi:10.3390/healthcare10091666), 2022-08-31
Supplement: s1 [file s1]

**Table S1.** Questionnaire for the Quality of Life of the post-COVID-19 patients.

The questionnaires included demographic and socioeconomic data, health status, the condition epidemic situation and EQ-5D scale.

1. Your sex: ☐male ☐female

2. Your age: \_\_\_\_ (year)

3. Your marital status: ☐married ☐unmarried ☐divorced ☐widowed

4. Your occupation: ☐In service ☐retirement ☐in home ☐no job

5. Your education level: ☐primary school education and below ☐high school

☐higher school ☐university and above

6. What is the level of your household income locally?

☐highest ☐high ☐normal ☐low ☐lowest

7. Are you worried that you will contract this disease?

☐very worried ☐worried ☐not worried ☐not worried at all

8. Have you suffered from a chronic disease in the past 6 months: ☐Yes ☐No

If you have a chronic disease, which of the following types (multiple choices) :

☐hypertension ☐diabetes ☐dyslipidemia ☐cerebrovascular disease  
☐heart disease (coronary heart disease, arrhythmia, heart valve disease) ☐bronchiectasis  
☐peripheral vascular disease ☐chronic obstructive pulmonary ☐asthma  
☐pulmonary fibrosis ☐viral hepatitis ☐fatty liver ☐other chronic liver diseases  
☐gallbladder disease ☐gastritis ☐gastric ulcer ☐duodenal ulcer ☐chronic enteritis ☐intestinal polyps ☐chronic pain ☐gout ☐arthritis ☐thyroid disease ☐kidney disease ☐bladder disease ☐uterine and ovarian disease ☐prostate disease ☐otitis media  
☐deafness ☐glaucoma ☐cataract ☐other eye diseases ☐skin diseases  
☐blood diseases ☐parkinson's disease ☐other diseases

9. The influence of the “COVID-19” on you in the following aspects:

| contents                | great negative | negative | a little negative | no | a little positive | positive | great positive |
|-------------------------|----------------|----------|-------------------|----|-------------------|----------|----------------|
| social activities       |                |          |                   |    |                   |          |                |
| daily life and schedule |                |          |                   |    |                   |          |                |
| sleep                   |                |          |                   |    |                   |          |                |
| diet                    |                |          |                   |    |                   |          |                |
| exercise                |                |          |                   |    |                   |          |                |

|                               |  |  |  |  |  |  |  |
|-------------------------------|--|--|--|--|--|--|--|
| working stability             |  |  |  |  |  |  |  |
| personal learning or creation |  |  |  |  |  |  |  |
| income                        |  |  |  |  |  |  |  |
| relationship with parents     |  |  |  |  |  |  |  |
| relationship with friends     |  |  |  |  |  |  |  |
| marriage relationship         |  |  |  |  |  |  |  |
| children education            |  |  |  |  |  |  |  |

### European five-dimensional health scale (EQ-5D)

Please indicate in the following set of options which statement best reflects your health status today, and type√ in the space.

#### Mobility

I can mobile around without any difficulty. ☐

I am a little inconvenient. ☐

I'm sick in bed. ☐

#### Self-Care

I can take care of myself without any difficulty. ☐

I have some difficulties in washing my face, brushing my teeth, bathing or dressing. ☐

I can't wash my face, brush my teeth, take a bath or dress myself. ☐

#### Usual activities (such as work, study, housework, family or leisure activities)

I can do usual activities without any difficulty. ☐

I have some difficulties in usual activities. ☐

I can't do usual activities. ☐

#### Pain/Discomfort

I don't have any pain or discomfort. ☐

I feel moderate pain or discomfort. ☐

I feel extreme pain or discomfort. ☐

#### Anxiety/Depression

I don't feel anxious or depressed. ☐

I feel moderate anxiety or depression. ☐

I feel extremely anxious or depressed. ☐

**Table S2.** Quantification of the parameters of the Quality of life of the post-COVID-19 patients.

| <b>Demographic and socioeconomic data, and health status</b> |                                                  |          |                   |                       |                   |          |                    |   |           |
|--------------------------------------------------------------|--------------------------------------------------|----------|-------------------|-----------------------|-------------------|----------|--------------------|---|-----------|
| marital status                                               | married                                          | 1        | unmarried         | 2                     | divorced          | 3        | widowed            | 4 |           |
| occupation                                                   | in service                                       | 1        | retirement        | 2                     | in home           | 3        | no job             | 4 |           |
| education /school                                            | primary                                          | 1        | high              | 2                     | higher            | 3        | university         | 4 |           |
| income                                                       | highest                                          | 1        | high              | 2                     | normal            | 3        | low                | 4 | minimal 5 |
| disease contract worry                                       | very worried                                     | 1        | worried           | 2                     | not worried       | 3        | not worried at all | 4 |           |
| chronic disease (n)                                          | Quantity from the list (each disease is 1 point) |          |                   |                       |                   |          |                    |   |           |
|                                                              | great negative                                   | negative | a little negative | no                    | a little positive | positive | great positive     |   |           |
| social activities                                            | 1                                                | 2        | 3                 | 4                     | 5                 | 6        | 7                  |   |           |
| daily life, schedule                                         | 1                                                | 2        | 3                 | 4                     | 5                 | 6        | 7                  |   |           |
| sleep                                                        | 1                                                | 2        | 3                 | 4                     | 5                 | 6        | 7                  |   |           |
| diet                                                         | 1                                                | 2        | 3                 | 4                     | 5                 | 6        | 7                  |   |           |
| exercise                                                     | 1                                                | 2        | 3                 | 4                     | 5                 | 6        | 7                  |   |           |
| working stability                                            | 1                                                | 2        | 3                 | 4                     | 5                 | 6        | 7                  |   |           |
| personal learning or creation                                | 1                                                | 2        | 3                 | 4                     | 5                 | 6        | 7                  |   |           |
| income                                                       | 1                                                | 2        | 3                 | 4                     | 5                 | 6        | 7                  |   |           |
| Relationship with parents                                    | 1                                                | 2        | 3                 | 4                     | 5                 | 6        | 7                  |   |           |
| relationship with friends                                    | 1                                                | 2        | 3                 | 4                     | 5                 | 6        | 7                  |   |           |
| marriage relationship                                        | 1                                                | 2        | 3                 | 4                     | 5                 | 6        | 7                  |   |           |
| children education                                           | 1                                                | 2        | 3                 | 4                     | 5                 | 6        | 7                  |   |           |
| <b>European five-dimensional health scale (EQ-5D)</b>        |                                                  |          |                   |                       |                   |          |                    |   |           |
| Mobility                                                     | without any difficulty                           |          | 0                 | a little inconvenient |                   | 1        | in bed             |   | 2         |
| Self-Care                                                    | without any difficulty                           |          | 0                 | some difficulties     |                   | 1        | dependent          |   | 2         |
| Usual activities                                             | without any difficulty                           |          | 0                 | some difficulties     |                   | 1        | no                 |   | 2         |
| Pain/Discomfort                                              | no                                               |          | 0                 | moderate              |                   | 1        | extreme            |   | 2         |
| Anxiety/Depression                                           | no                                               |          | 0                 | moderate              |                   | 1        | extreme            |   | 2         |

**Table S3.** Effect sizes with 95% confidence interval for 5 dimensions of EQ-5D in post-COVID-19 patients after 2.5 months of hospital admission.

| EQ-5D                            | Mobility<br>t ; df<br>MD (95%CI)<br>d               | Self-care<br>t ; df<br>MD (95%CI)<br>d           | Usual activities<br>t ; df<br>MD (95%CI)<br>d       | Pain / discomfort<br>t ; df<br>MD (95%CI)<br>d        | Anxiety /<br>depression<br>t ; df<br>MD (95%CI)<br>d |
|----------------------------------|-----------------------------------------------------|--------------------------------------------------|-----------------------------------------------------|-------------------------------------------------------|------------------------------------------------------|
| <b>Sex, female</b>               | t=1.371;df=82<br>0.158<br>(-0.071-0.387)<br>d=0.33  | t=0.649;df=82<br>-0.017<br>(-0.069-0.035)<br>d=0 | t=1.284;df=81<br>0.136<br>(-0.075-0.346)<br>d=0.31  | t=2.996;df=82<br>0.341<br>(0.115-0.567)<br>d=0.71     | t=3.473;df=82<br>0.321<br>(0.137-0.505)<br>d=0.75    |
| <b>Age &gt;50</b>                | t=2.833;df=82<br>0.312<br>(0.093-0.531)<br>d=0.73   | t=1.505;df=82<br>-0.038<br>(-0.089-0.012)<br>d=0 | t=1.989;df=81<br>0.208<br>(0.000-0.415)<br>d=0.51   | t=1.161;df=82<br>0.137<br>(-0.097-0.371)<br>d=0.26    | t=0.897;df=82<br>0.088<br>(-0.107-0.282)<br>d=0.22   |
| <b>Marital status</b>            | t=0.570;df=82<br>0.069<br>(-0.172-0.310)<br>d=0.14  | t=0.593;df=82<br>0.016<br>(-0.038-0.070)<br>d=0  | t=0.652;df=81<br>-0.072<br>(-0.293-0.148)<br>d=0.15 | t=0.153;df=82<br>-0.019<br>(-0.267-0.229)<br>d=0.02   | t=0.171;df=82<br>-0.018<br>(-0.223-0.187)<br>d=0.05  |
| <b>Employment status</b>         | t=0.183;df=81<br>0.041<br>(-0.405-0.487)<br>d=0.08  | t=0.252;df=81<br>-0.013<br>(-0.114-0.089)<br>d=0 | t=1.738;df=80<br>0.353<br>(-0.051-0.758)<br>d=0.71  | t=0.155;df=81<br>-0.036<br>(-0.496-0.425)<br>d=0.08   | t=0.093;df=81<br>-0.018<br>(-0.401-0.365)<br>d=0.05  |
| <b>Chronic disease condition</b> | t=1.849;df=81<br>0.198<br>(-0.015-0.410)<br>d=0.43  | t=0.811;df=81<br>0.020<br>(-0.029-0.069)<br>d=0  | t=0.936;df=80<br>0.094<br>(-0.106-0.294)<br>d=0.23  | t=1.041;df=81<br>0.116<br>(-0.106-0.339)<br>d=0.24    | t=0.623;df=81<br>0.058<br>(-0.128-0.244)<br>d=0.15   |
| <b>Education level</b>           | t=1.770;df=82<br>-0.200<br>(-0.425-0.025)<br>d=0.43 | t=0.667;df=82<br>-0.017<br>(-0.069-0.034)<br>d=0 | t=1.554;df=81<br>-0.162<br>(-0.369-0.045)<br>d=0.40 | t=3.216;df=82<br>-0.359<br>(-0.582to-0.137)<br>d=0.79 | t=0.897;df=82<br>-0.088<br>(-0.282-0.107)<br>d=0.22  |
| <b>Income level</b>              | t=0.125;df=82<br>0.018<br>(-0.275-0.311)<br>d=0.02  | t=0.426;df=82<br>-0.014<br>(-0.080-0.052)<br>d=0 | t=1.058;df=81<br>0.142<br>(-0.125-0.408)<br>d=0.30  | t=1.381;df=82<br>0.207<br>(-0.091-0.505)<br>d=0.42    | t=0.156;df=82<br>0.020<br>(-0.230-0.269)<br>d=0.05   |
| <b>Worry about get COVID-19</b>  | t=1.886;df=82<br>0.197<br>(-0.011-0.404)<br>d=0.40  | t=1.024;df=82<br>-0.024<br>(-0.072-0.023)<br>d=0 | t=1.807;df=81<br>0.174<br>(-0.018-0.365)<br>d=0.39  | t=2.751;df=82<br>0.289<br>(0.080-0.497)<br>d=0.60     | t=0.944;df=82<br>0.085<br>(-0.094-0.264)<br>d=0.22   |
| <b>Epidemic effects</b>          | t=0.071;df=82<br>-0.008<br>(-0.243-0.226)<br>d=0.02 | t=0.630;df=82<br>0.017<br>(-0.036-0.069)<br>d=0  | t=1.860;df=81<br>0.197<br>(-0.014-0.408)<br>d=0.46  | t=0.758;df=82<br>0.092<br>(-0.149-0.332)<br>d=0.18    | t=1.866;df=82<br>0.183<br>(-0.012-0.379)<br>d=0.51   |
| <b>Clinical outcome</b>          | t=0.060;df=82<br>-0.007<br>(-0.248-0.234)<br>d=0.03 | t=0.593;df=82<br>-0.016<br>(-0.070-0.038)<br>d=0 | t=2.402;df=81<br>0.258<br>(0.044-0.471)<br>d=0.54   | t=1.861;df=82<br>-0.227<br>(-0.470-0.016)<br>d=0.48   | t=1.649;df=82<br>-0.167<br>(-0.369-0.035)<br>d=0.45  |
| <b>Vaccine</b>                   | t=0.663;df=82<br>0.072<br>(-0.144-0.287)<br>d=0.14  | t=0.823;df=82<br>-0.020<br>(-0.068-0.028)<br>d=0 | t=0.999;df=81<br>0.099<br>(-0.098-0.296)<br>d=0.22  | t=1.353;df=82<br>0.149<br>(-0.070-0.369)<br>d=0.30    | t=0.922;df=82<br>0.085<br>(-0.098-0.267)<br>d=0.18   |

t: t-value; df: degree of freedom; MD: mean difference; d: effect size.

**Table S4.** Effect sizes with 95% confidence interval for 5 dimensions of EQ-5D in post-COVID-19 patients after 5 months of hospital admission.

| EQ-5D                            | Mobility<br>t ; df<br>MD (95%CI)<br>d               | Self-care<br>t ; df<br>MD (95%CI)<br>d           | Usual activities<br>t ; df<br>MD (95%CI)<br>d         | Pain / discomfort<br>t ; df<br>MD (95%CI)<br>d        | Anxiety /<br>depression<br>t ; df<br>MD (95%CI)<br>d |
|----------------------------------|-----------------------------------------------------|--------------------------------------------------|-------------------------------------------------------|-------------------------------------------------------|------------------------------------------------------|
| <b>Sex, female</b>               | t=2.207;df=66<br>0.268<br>(0.026-0.511)<br>d=0.54   | t=0.666;df=66<br>-0.021<br>(-0.085-0.043)<br>d=0 | t=3.674;df=66<br>0.370<br>(0.169-0.571)<br>d=0.87     | t=1.334;df=63<br>0.178<br>(-0.089-0.446)<br>d=0.36    | t=3.404;df=65<br>0.372<br>(0.154-0.590)<br>d=0.83    |
| <b>Age &gt;50</b>                | t=2.444;df=66<br>0.309<br>(0.057-0.561)<br>d=0.74   | t=0.597;df=66<br>0.020<br>(-0.047-0.087)<br>d=0  | t=1.303;df=66<br>0.149<br>(-0.079-0.377)<br>d=0.39    | t=1.829;df=63<br>0.246<br>(-0.023-0.514)<br>d=0.34    | t=1.779;df=65<br>0.215<br>(-0.026-0.457)<br>d=0.54   |
| <b>Marital status</b>            | t=1.104;df=66<br>-0.144<br>(-0.406-0.117)<br>d=0.29 | t=0.597;df=66<br>0.020<br>(-0.047-0.087)<br>d=0  | t=2.782;df=66<br>-0.304<br>(-0.523to-0.086)<br>d=0.68 | t=0.683;df=63<br>-0.096<br>(-0.375-0.184)<br>d=0.18   | t=1.344;df=65<br>-0.164<br>(-0.409-0.080)<br>d=0.37  |
| <b>Employment status</b>         | t=0.697;df=66<br>0.172<br>(-0.320-0.664)<br>d=0.32  | t=0.248;df=66<br>-0.016<br>(-0.141-0.110)<br>d=0 | t=0.144;df=66<br>0.031<br>(-0.402-0.464)<br>d=0.07    | t=0.238;df=63<br>-0.070<br>(-0.657-0.518)<br>d=0.13   | t=0.086;df=65<br>-0.020<br>(-0.483-0.444)<br>d=0.04  |
| <b>Chronic disease condition</b> | t=1.476;df=66<br>0.174<br>(-0.061-0.409)<br>d=0.27  | t=1.277;df=66<br>-0.038<br>(-0.099-0.022)<br>d=0 | t=0.437;df=66<br>0.046<br>(-0.164-0.255)<br>d=0.23    | t=2.333;df=63<br>0.282<br>(0.041-0.524)<br>d=0.24     | t=1.116;df=65<br>0.125<br>(-0.098-0.348)<br>d=0.15   |
| <b>Education level</b>           | t=1.459;df=66<br>-0.197<br>(-0.467-0.073)<br>d=0.42 | t=0.552;df=66<br>-0.019<br>(-0.089-0.050)<br>d=0 | t=1.047;df=66<br>-0.125<br>(-0.363-0.113)<br>d=0.31   | t=2.688;df=63<br>-0.365<br>(-0.636to-0.094)<br>d=0.83 | t=1.488;df=65<br>-0.189<br>(-0.442-0.065)<br>d=0.44  |
| <b>Income level</b>              | t=1.805;df=65<br>0.320<br>(-0.034-0.674)<br>d=0.65  | t=0.366;df=65<br>-0.017<br>(-0.109-0.076)<br>d=0 | t=2.028;df=65<br>0.314<br>(0.005-0.622)<br>d=0.66     | t=1.031;df=62<br>0.203<br>(-0.190-0.596)<br>d=0.39    | t=1.544;df=64<br>0.259<br>(-0.076-0.593)<br>d=0.53   |
| <b>Worry about get COVID-19</b>  | t=0.253;df=66<br>0.029<br>(-0.203-0.262)<br>d=0.06  | t=1.00;df=66<br>-0.029<br>(-0.088-0.029)<br>d=0  | t=0.869;df=66<br>0.088<br>(-0.114-0.291)<br>d=0.19    | t=1.107;df=63<br>0.135<br>(-0.109-0.380)<br>d=0.28    | t=0.618;df=65<br>0.068<br>(-0.151-0.287)<br>d=0.13   |
| <b>Epidemic effects</b>          | t=0.044;df=64<br>-0.006<br>(-0.278-0.266)<br>d=0.0  | t=0.586;df=64<br>0.020<br>(-0.049-0.090)<br>d=0  | t=573;df=64<br>0.068<br>(-0.170-0.307)<br>d=0.14      | t=1.734;df=61<br>-0.240<br>(-0.518-0.037)<br>d=0.49   | t=1.070;df=63<br>0.136<br>(-0.118-0.390)<br>d=0.30   |
| <b>Clinical outcome</b>          | t=1.302;df=66<br>0.196<br>(-0.105-0.498)<br>d=0.40  | t=0.460;df=66<br>-0.018<br>(-0.095-0.060)<br>d=0 | t=2.667;df=66<br>0.339<br>(0.085-0.593)<br>d=0.75     | t=0.693;df=63<br>-0.118<br>(-0.459-0.222)<br>d=0.48   | t=0.551;df=65<br>0.079<br>(-0.207-0.364)<br>d=0.21   |
| <b>Vaccine</b>                   | t=0.075;df=66<br>-0.009<br>(-0.243-0.225)<br>d=0.02 | t=1.128;df=66<br>0.033<br>(-0.026-0.092)<br>d=0  | t=0.222;df=66<br>0.023<br>(-0.182-0.228)<br>d=0.05    | t=2.634;df=63<br>0.310<br>(0.075-0.544)<br>d=0.65     | t=2.232;df=65<br>0.238<br>(0.025-0.451)<br>d=0.54    |

t: t-value; df: degree of freedom; MD: mean difference; d: effect size.
